# Supplementary material for: Contrasting Computational Models of Mate Preference Integration Across 45 Countries
Source: PubMed Central journal article supplement (PMC6858324; doi:10.1038/s41598-019-52748-8), 2019-11-15
Supplement: 41598_2019_52748_MOESM1_ESM.pdf [file 41598_2019_52748_MOESM1_ESM.pdf]

1 Supplementary Information: Contrasting Computational Models of Mate Preference Integration  
2 Across 45 Countries  
3

4 Daniel Conroy-Beam\*<sup>1</sup>, David M. Buss<sup>2</sup>, Kelly Asao<sup>2</sup>, Agnieszka Sorokowska<sup>3,4</sup>, Piotr  
5 Sorokowski<sup>3</sup>, Toivo Aavik<sup>5</sup>, Grace Akello<sup>6</sup>, Mohammad Madallh Alhababha<sup>7</sup>, Charlotte Alm<sup>8</sup>,  
6 Naumana Amjad<sup>9</sup>, Afifa Anjum<sup>9</sup>, Chiemezie S. Atama<sup>10</sup>, Derya Atamtürk Duyar<sup>11</sup>, Richard  
7 Ayebare<sup>12</sup>, Carlota Batres<sup>13</sup>, Mons Bendixen<sup>14</sup>, Aicha Bensafia<sup>15</sup>, Boris Bizumic<sup>16</sup>, Mahmoud  
8 Boussena<sup>17</sup>, Marina Butovskaya<sup>18,19</sup>, Seda Can<sup>20</sup>, Katarzyna Cantarero<sup>21</sup>, Antonin Carrier<sup>22</sup>,  
9 Hakan Cetinkaya<sup>23</sup>, Iлона Croy<sup>24</sup>, Rosa María Cueto<sup>25</sup>, Marcin Czub<sup>3</sup>, Daria Dronova<sup>18</sup>, Seda  
10 Dural<sup>20</sup>, Izzet Duyar<sup>11</sup>, Berna Ertugrul<sup>26</sup>, Agustín Espinosa<sup>25</sup>, Ignacio Estevan<sup>27</sup>, Carla Sofia  
11 Esteves<sup>28</sup>, Luxi Fang<sup>29</sup>, Tomasz Frackowiak<sup>3</sup>, Jorge Contreras Garduño<sup>30</sup>, Karina Ugalde  
12 González<sup>31</sup>, Farida Guemaz<sup>32</sup>, Petra Gyuris<sup>33</sup>, Mária Halamová<sup>34</sup>, Iskra Herak<sup>35</sup>, Marina  
13 Horvat<sup>36</sup>, Ivana Hromatko<sup>37</sup>, Chin-Ming Hui<sup>29</sup>, Jas Laile Jaafar<sup>38</sup>, Feng Jiang<sup>39</sup>, Konstantinos  
14 Kafetsios<sup>40</sup>, Tina Kavčič<sup>41</sup>, Leif Edward Ottesen Kennair<sup>14</sup>, Nicolas Kervyn<sup>35</sup>, Truong Thi Khanh  
15 Ha<sup>42</sup>, Imran Ahmed Khilji<sup>43</sup>, Nils C. Köbis<sup>44</sup>, Hoang Moc Lan<sup>42</sup>, András Láng<sup>33</sup>, Georgina R.  
16 Lennard<sup>16</sup>, Ernesto León<sup>25</sup>, Torun Lindholm<sup>8</sup>, Trinh Thi Linh<sup>42</sup>, Giulia Lopez<sup>45</sup>, Nguyen Van  
17 Luot<sup>42</sup>, Alvaro Mailhos<sup>27</sup>, Zoi Manesi<sup>46</sup>, Rocio Martinez<sup>47</sup>, Sarah L. Mc Kerchar<sup>16</sup>, Norbert  
18 Meskó<sup>33</sup>, Girishwar Misra<sup>48</sup>, Conal Monaghan<sup>16</sup>, Emanuel C. Mora<sup>49</sup>, Alba Moya-Garófano<sup>47</sup>,  
19 Bojan Musil<sup>50</sup>, Jean Carlos Natividade<sup>51</sup>, Agnieszka Niemczyk<sup>3</sup>, George Nizharadze<sup>52</sup>, Elisabeth  
20 Oberzaucher<sup>53</sup>, Anna Oleszkiewicz<sup>3,4</sup>, Mohd Sofian Omar-Fauzee<sup>54</sup>, Ike E. Onyishi<sup>55</sup>, Baris  
21 Özener<sup>11</sup>, Ariela Francesca Pagani<sup>45</sup>, Vilmante Pakalniskiene<sup>56</sup>, Miriam Parise<sup>45</sup>, Farid  
22 Pazhoohi<sup>57</sup>, Annette Pisanski<sup>49</sup>, Katarzyna Pisanski<sup>3,58</sup>, Edna Ponciano<sup>59</sup>, Camelia Popa<sup>60</sup>, Pavol  
23 Prokop<sup>61,62</sup>, Muhammad Rizwan<sup>63</sup>, Mario Sainz<sup>64</sup>, Svjetlana Salkičević<sup>65</sup>, Ruta Sargautyte<sup>56</sup>, Ivan  
24 Sarmány-Schuller<sup>66</sup>, Susanne Schmehl<sup>53</sup>, Shivantika Sharad<sup>67</sup>, Razi Sultan Siddiqui<sup>68</sup>, Franco  
25 Simonetti<sup>69</sup>, Stanislava Yordanova Stoyanova<sup>70</sup>, Meri Tadinac<sup>65</sup>, Marco Antonio Correa  
26 Varella<sup>71</sup>, Christin-Melanie Vaclair<sup>28</sup>, Luis Diego Vega<sup>31</sup>, Dwi Ajeng Widarini<sup>72</sup>, Gyesook  
27 Yoo<sup>73</sup>, Marta Zaťková<sup>74</sup>, Maja Zupančič<sup>75</sup>

28  
29 <sup>1</sup>Department of Psychological and Brain Sciences, University of California, Santa Barbara, Santa Barbara, 93106,  
30 United States of America. <sup>2</sup>Department of Psychology, University of Texas at Austin, Austin, 78712, United States  
31 of America. <sup>3</sup>Institute of Psychology, University of Wrocław, Wrocław, 50-137, Poland. <sup>4</sup>Smell & Taste Clinic,  
32 Department of Otorhinolaryngology, TU Dresden, Dresden, 01307, Germany. <sup>5</sup>Institute of Psychology, University  
33 of Tartu, Tartu, 50090, Estonia. <sup>6</sup>Department of Mental Health, Faculty of Medicine, Gulu University, Gulu,  
34 Uganda. <sup>7</sup>English Language Department, Middle East University, Amman, 11181, Jordan. <sup>8</sup>Department of  
35 Psychology, Stockholm University, Stockholm, 10691, Sweden. <sup>9</sup>Institute of Applied Psychology, University of the  
36 Punjab, Lahore, 54590, Pakistan. <sup>10</sup>Department of Sociology and Anthropology, University of Nigeria, Nsukka,  
37 410002, Nigeria. <sup>11</sup>Department of Anthropology, Istanbul University, Istanbul, 34452, Turkey. <sup>12</sup>North Star Alliance,  
38 Kampala, Uganda. <sup>13</sup>Department of Psychology, Franklin and Marshall College, Lancaster, 17603, United States of  
39 America. <sup>14</sup>Department of Psychology, Norwegian University of Technology and Science (NTNU), Trondheim,  
40 7491, Norway. <sup>15</sup>EFORT, Department of Sociology, University of Algiers 2, Algiers, 16000, Algeria. <sup>16</sup>Research  
41 School of Psychology, Australian National University, Canberra, 2601, Australia. <sup>17</sup>EFORT, Department of  
42 Psychology and Educational Sciences, University of Algiers 2, Algiers, 16000, Algeria. <sup>18</sup>Institute of Ethnology and  
43 Anthropology, Russian Academy of Sciences, Moscow, 119991, Russia. <sup>19</sup>Russian State University for the  
44 Humanities, Moscow, 119991, Russia. <sup>20</sup>Department of Psychology, Izmir University of Economics, Izmir, 35300,  
45 Turkey. <sup>21</sup>Social Behavior Research Center, Faculty in Wrocław, SWPS University of Social Sciences and  
46 Humanities, Wrocław, 53-238, Poland. <sup>22</sup>Psychology Faculty (CECOS), Université Catholique de Louvain,  
47 Louvain-la-Neuve, 1348, Belgium. <sup>23</sup>Department of Psychology, Ankara University, Ankara, 6560, Turkey.  
48 <sup>24</sup>Department of Psychotherapy and Psychosomatic Medicine, TU Dresden, Dresden, 1069, Germany. <sup>25</sup>Grupo de  
49 Psicología Política y Social (GPPS), Departamento de Psicología, Pontificia Universidad Católica del Perú, Lima,  
50 15088, Perú. <sup>26</sup>Department of Anthropology, Sivas Cumhuriyet University, Sivas, 58140, Turkey. <sup>27</sup>Facultad de

51 Psicología, Universidad de la República, Motevideo, 11200, Uruguay. <sup>28</sup>Instituto Universitário de Lisboa (ISCTE-  
52 IUL), CIS-IUL, Lisboa, 1649-026, Portugal. <sup>29</sup>Department of Psychology, Chinese University of Hong Kong, Hong  
53 Kong, China. <sup>30</sup>Escuela Nacional de Estudios Superiores, Unidad Morelia UNAM, Morelia, 58190, Mexico.  
54 <sup>31</sup>Psychology Department, Universidad Latina de Costa Rica, San José, 11501, Costa Rica. <sup>32</sup>EFORT, Department of  
55 Psychology and Educational Sciences, University of Setif 2, Setif, 16000, Algeria. <sup>33</sup>Institute of Psychology,  
56 University of Pécs, Pécs, 7624, Hungary. <sup>34</sup>Faculty of Social Sciences and Health Care, Department of  
57 Psychological Sciences, Constantine the Philosopher University in Nitra, Nitra, 94974, Slovakia. <sup>35</sup>Louvain  
58 Research Institute in Management and Organisations (LOURiM), Université Catholique de Louvain, Louvain-la-  
59 Neuve, 1348, Belgium. <sup>36</sup>Faculty of Arts, Department of Psychology, University of Maribor, Maribor, 2000,  
60 Slovenia. <sup>37</sup>Department of Psychology, Faculty for Humanities and Social Sciences, University of Zagreb, Zagreb,  
61 10000, Croatia. <sup>38</sup>Dept of Educational Psychology and Counseling, University of Malaya, Kuala Lumpur, 50603,  
62 Malaysia. <sup>39</sup>Organization and Human Resource Management, Central University of Finance and Economics,  
63 Beijing, 100081, China. <sup>40</sup>Psychology Department, University of Crete, Rethymno, 70013, Greece. <sup>41</sup>Faculty of  
64 Education, University of Primorska, Koper, 6000, Slovenia. <sup>42</sup>Department of Psychology, University of Social  
65 Sciences and Humanities, Hanoi, 100000, Vietnam. <sup>43</sup>Department of Psychology, IMCB, F-10/4, Islamabad, 44000,  
66 Pakistan. <sup>44</sup>Center for Research in Experimental Economics and Political Decision Making, Department of  
67 Economics, University of Amsterdam, Amsterdam, 1081, Netherlands. <sup>45</sup>Department of Psychology, Università  
68 Cattolica del Sacro Cuore, Milan, 20123, Italy. <sup>46</sup>Department of Experimental & Applied Psychology, Vrije  
69 Universiteit Amsterdam, Amsterdam, 1081, Netherlands. <sup>47</sup>Department of Social Psychology, University of  
70 Granada, Granada, 18010, Spain. <sup>48</sup>Department of Psychology, University of Delhi, Delhi, 110021, India.  
71 <sup>49</sup>Department of Animal and Human Biology, Faculty of Biology, University of Havana, Havana, Cuba.  
72 <sup>50</sup>Department of Psychology, Faculty of Arts, University of Maribor, Maribor, 2000, Slovenia. <sup>51</sup>Department of  
73 Psychology, Pontifical Catholic University of Rio de Janeiro, Rio de Janeiro, 22451-000, Brazil. <sup>52</sup>Department of  
74 Social Sciences, Free University of Tbilisi, Tbilisi, 2, Georgia. <sup>53</sup>Faculty of Life Sciences, University of Vienna,  
75 Vienna, 1090, Austria. <sup>54</sup>School of Education, Universiti Utara Malaysia, Sintok, 6010, Malaysia. <sup>55</sup>Department of  
76 Psychology, University of Nigeria, Nsukka, 410002, Nigeria. <sup>56</sup>Institute of Psychology, Vilnius University, Vilnius,  
77 1513, Lithuania. <sup>57</sup>Department of Psychology, University of British Columbia, Vancouver, V6T 1Z4, Canada.  
78 <sup>58</sup>Mammal Vocal Communication & Cognition Research Group, University of Sussex, Brighton, BN1 9RH, United  
79 Kingdom. <sup>59</sup>Institute of Psychology, University of the State of Rio de Janeiro, Rio de Janeiro, 21941-901, Brazil.  
80 <sup>60</sup>Department of Psychology, Faculty for Humanities and Social Sciences, UNATC-CINETIC, Romanian Academy,  
81 Bucharest, 30167, Romania. <sup>61</sup>Department of Environmental Ecology, Comenius University, Bratislava, 842 15,  
82 Slovakia. <sup>62</sup>Institute of Zoology, Slovak Academy of Sciences, Bratislava, 845 06, Slovakia. <sup>63</sup>The Delve Pvt Ltd,  
83 Islamabad, 44000, Pakistan. <sup>64</sup>School of Psychology, University of Monterrey, San Pedro Garza Garcia, 66238,  
84 Mexico. <sup>65</sup>Department of Psychology, Faculty for Humanities and Social Sciences, University of Zagreb, Zagreb,  
85 10000, Croatia. <sup>66</sup>Center for Social and Psychological Sciences, Institute of Experimental Psychology SAS,  
86 Bratislava, 841 04, Slovakia. <sup>67</sup>Department of Applied Psychology, Vivekananda College, University of Delhi,  
87 Delhi, 110021, India. <sup>68</sup>Department of Management Sciences, DHA Suffa University, Karachi, 75500, Pakistan.  
88 <sup>69</sup>School of Psychology, P. Universidad Catolica de Chile, Santiago, 8331150, Chile. <sup>70</sup>Department of Psychology,  
89 South-West University "Neofit Rilski", Blagoevgrad, 2700, Bulgaria. <sup>71</sup>Department of Experimental Psychology,  
90 Institute of Psychology, University of São Paulo, São Paulo, 05508-030, Brazil. <sup>72</sup>Department of Communication,  
91 University Prof. Dr. Moestopo (Beragama), Jakarta, 10270, Indonesia. <sup>73</sup>Dept. of Child & Family Studies, Kyung  
92 Hee University, Seoul, 024-47, Republic of Korea. <sup>74</sup>Faculty of Social Sciences and Health Care, Department of  
93 Psychological Sciences, Constantine the Philosopher University in Nitra, Nitra, 94974, Slovakia. <sup>75</sup>Department of  
94 Psychology, Faculty of Arts, University of Ljubljana, Ljubljana, 1000, Slovenia.

96 \*Corresponding author: Daniel Conroy-Beam, Department of Psychological and Brain Sciences,  
97 University of California, Santa Barbara, 93106; telephone: 805-893-2121; email:  
98 [dconroybeam@ucsb.edu](mailto:dconroybeam@ucsb.edu)

99

**100 Supplementary Note 1: Agent-Based Models Using an Alternative Mating Market****101 Structure**

102 Agents in six of the primary agent-based models paired based on a mutual attraction  
103 model of mate choice. In these models, the attraction matrices for each sex were multiplied  
104 together elementwise and pairing began with the most mutually attracted pair. This market  
105 structure produced strong correspondence between the agent-based models and the human data.  
106 However, to test the robustness of these results, we also ran a separate set of models with a  
107 different mating market structure.

108 In this alternative model, agents paired based on minimum, rather than mutual attraction.  
109 In these models, agents computed their attraction to all opposite-sex agents using their preference  
110 integration algorithms just as in the primary models. However, the model then identified the least  
111 attracted member of each possible couple rather than the mutual attraction of all possible  
112 couples. The model next paired the agents with the highest minimum in-pair attraction value,  
113 iterating this pairing until all possible couples were formed. These minimum attraction models  
114 were identical to the mutual attraction models in all other respects.

115 We compared the results of the minimum attraction models to the human cross-cultural  
116 sample using the same model training and testing procedure as in the primary agent-based  
117 models. Supplementary Fig. S2 shows the results of this model comparison process. Just as in the  
118 primary models, the model in which agents integrate their preferences according to a Euclidean  
119 algorithm provides the strongest fit to the cross-cultural human sample among the six alternative  
120 models of mate preference integration. The results of the primary agent-based models, in which  
121 the Euclidean algorithm produces the best approximation of the cross-cultural human data, are  
122 therefore not limited to the mutual attraction model of mate choice.

**123 Supplementary Note 2: Agent-Based Models Incorporating Incomplete Mate Search**

124 Agents in each of the primary models conduct a complete search of their local mating  
125 market: each agent has information on and ultimately selects from the total set of 100 potential  
126 mates that exist in their population. While this number is within estimated limits on human social  
127 group sizes, this simplified population structure constitutes a potentially unrealistic assumption  
128 for at least three reasons. First, this implicitly supposes that all individuals in the population have  
129 perfectly overlapping social networks. Second, this population structure assumes that there is no  
130 randomness within and no limitations on the mate search process. Third, this is a large set of  
131 potential mates to consider, which may be computationally implausible. To assess whether the  
132 results reported in the primary agent-based models are dependent on this assumption, we created  
133 an alternative model in which mate search is incomplete.

134 These incomplete search models are identical to the primary agent-based models except  
135 for just one change. When the models compute the mutual attraction matrix, a random subset of  
136 50 potential mates are eliminated immediately for each agent. These agent couples are therefore  
137 incapable of pairing regardless of what their attraction values would have been otherwise. This  
138 elimination simulates an incomplete and partially random search of the mating market by each  
139 agent and makes it such that different agents have slightly different—albeit overlapping—social  
140 networks in that each agent functionally “knows” just a random subset of the total population.

141 We compared the populations produced by these incomplete search models to the human  
142 cross-cultural sample using the same training and testing procedure as used for the primary  
143 agent-based models. Supplementary Fig. S3 presents these results. Simulating incomplete search  
144 does not substantially change the relative model fits. Across all parameter settings, the Euclidean  
145 agent-based models still provide the best overall fit to the human cross-cultural sample relative to

146 all of the other agent-based models of mate preference integration and still provide a fit relatively  
147 similar to the regression model both trained and tested on the data itself. The relatively good  
148 performance of this model in explaining the human cross-cultural data therefore does not appear  
149 to emerge because of the assumption of complete mate search in the primary agent-based  
150 models.

### 151 **Supplementary Note 3: Comparing Agent-Based Models and Human Data Beyond Self-** 152 **Report**

153         The primary agent-based models showed a strong correspondence between the Euclidean  
154 model and the human cross-cultural data. However, a limitation of the human sample is that all  
155 data is self-report: participants reported both their own traits and preferences as well as the traits  
156 of their partners, if applicable. It is possible that this led to biased reports of mates, yielding  
157 biased results.

158         We addressed this problem in two ways. First, the preference-updating model allowed us  
159 to test the hypothesis that biased reports of preferences (or biased perception of partners) would  
160 spuriously produce the pattern of results observed in the human cross-cultural data. Although this  
161 biased report model can produce comparable levels of mate preference fulfillment as observed  
162 across cultures, it cannot produce the correlations between participant mate value and mate  
163 preference fulfillment, ideal mate value, or partner mate value (Supplementary Figure S1; Figure  
164 3). This suggests that rating bias alone cannot account for the correspondence between the  
165 Euclidean agent-based model and the human cross-cultural sample.

166         Second and furthermore, we were able to leverage the design of this study to extract  
167 partner ratings for a subset of the sample, allowing us to conduct the same tests on data that did  
168 not rely exclusively on self-report. Although data collection in the cross-cultural sample was

169 entirely self-report, and although participants were not specifically recruited in dyads, in some  
170 cases participants did complete the study along with their actual romantic partner. These dyadic  
171 participations were not recorded; however, we can, through participant responses, infer which  
172 participants were members of dyads rather than participating alone. We used two sets of criteria  
173 for inferring dyads from the cross-cultural human sample: a “strict” criterion and a “less-strict”  
174 criterion. For the strict criterion, we classified two participants as belonging to a dyad if they had  
175 complimentary answers on the following questions: city of residence, own age and partner age,  
176 relationship length, relationship status, whether they saw their partner in the last week, whether  
177 they met their partner in the last week, number of children, and age of youngest child. This dyad  
178 inference process additionally only searched for heterosexual couples. The less strict criterion  
179 excluded information about number and age of children under the assumption that some mated  
180 individuals could have different responses to these questions if they had children from prior  
181 relationships.

182         Pairing participants into dyads based on the strict criteria produced a sample of  $n = 394$   
183 participants belonging to 197 inferred romantic dyads. Using the less-strict criteria resulted in  $n$   
184 = 498 participants belonging to 249 dyads. To assess the risk of pairing participants into false  
185 dyads by chance, we ran the same dyad inference procedure on a sample in which we first  
186 randomly scrambled the responses used to pair participants into dyads within city. On this  
187 scrambled data, both dyad inference procedures produced zero inferred dyads.

188         With dyads, we can compare agent-based models to the human samples using responses  
189 beyond self-report. Rather than relying on self-reports for self and partner traits, we calculated  
190 composite trait scores for all participants by averaging self- and partner-reports. We then  
191 conducted the same analyses on these samples as in the full cross-cultural human sample.

192           Supplementary Figs. S4 and S5 show the results of these analyses for the strict and less-  
193 strict dyads respectively. In both cases, most models produced substantially lower predicted-  
194 observed value correlations than the Euclidean model; the only exceptions were the linear and  
195 polynomial models. For the less-strict dyads, the linear and polynomial models produced  
196 observed-predicted value correlations comparable to or higher than the Euclidean model in most  
197 parameter settings. For the strict dyads, the linear and polynomial models produced observed-  
198 predicted value correlations that approximated the Euclidean models in only one parameter  
199 setting. However, the Euclidean model produced a lower RMSE than the linear and polynomial  
200 models across all parameter settings; it was only matched by the preference-updating model on  
201 RMSE in 3 out of the 9 parameter settings. Overall, across all 9 parameter settings and across the  
202 two model fit estimates, the Euclidean agent-based model still produced the best fit to the human  
203 cross-cultural data in both the strict and less strict dyad inference criteria. This suggests the  
204 strong correspondence between the Euclidean agent-based model and the cross-cultural human  
205 data is not an artifact of self-report data collection.

206 **Supplementary Note 4: Institutional Review Boards and Ethics Committees that Approved**  
207 **this Study**

208 Ethical Committee of the Institute of Psychology, University of Wroclaw

209 The Survey and Behavioural Research Ethics Committee at the Chinese University of Hong  
210 Kong

211 The ANU Human Research Ethics Committee at The Australian National University

212 The Ethical Review Board of Vrije Universiteit Amsterdam

213 Ethics committee of the Department of Psychology, Faculty of Humanities and Social Sciences,  
214 University of Zagreb

215 University of Crete Psychology Department Research Ethics Committee

216 South-West University Neofit Rilski, Department of Psychology

217 Research Ethics Committee of the University of Tartu (UTREC)

- 218 Ethical Committee of the Technical University of Dresden
- 219 Ethical Commission in Research of the ENES, UNAM, Morelia
- 220 Ethics Review Board of CUFE Business School
- 221 Scientific Council of the Institute of Ethnology and Anthropology, RAS, Moscow, Russia
- 222 Ethics Council of the University of Setif 2, Algeria
- 223 Institutional Review Board of the University of Texas at Austin
- 224
- 225



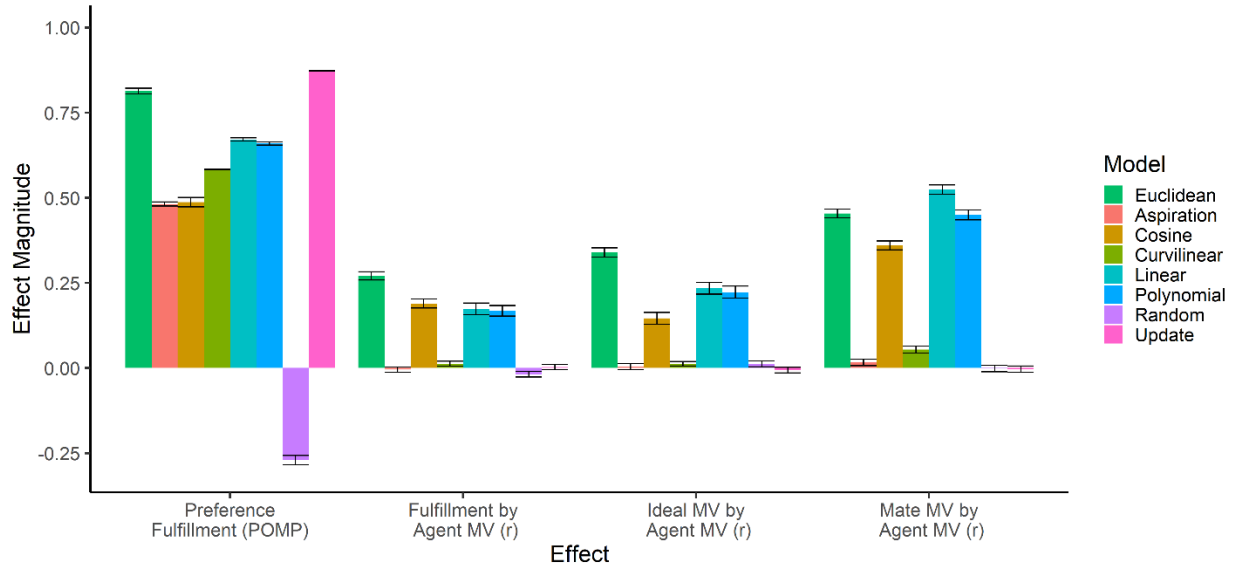

226

227 **Supplementary Figure S1.** A comparison of mate choice effects across all agent-based models

228 and across parameter settings. “POMP” = percentage of maximum possible; “*r*” = correlation.

229 Error bars represent 95% confidence intervals.

230

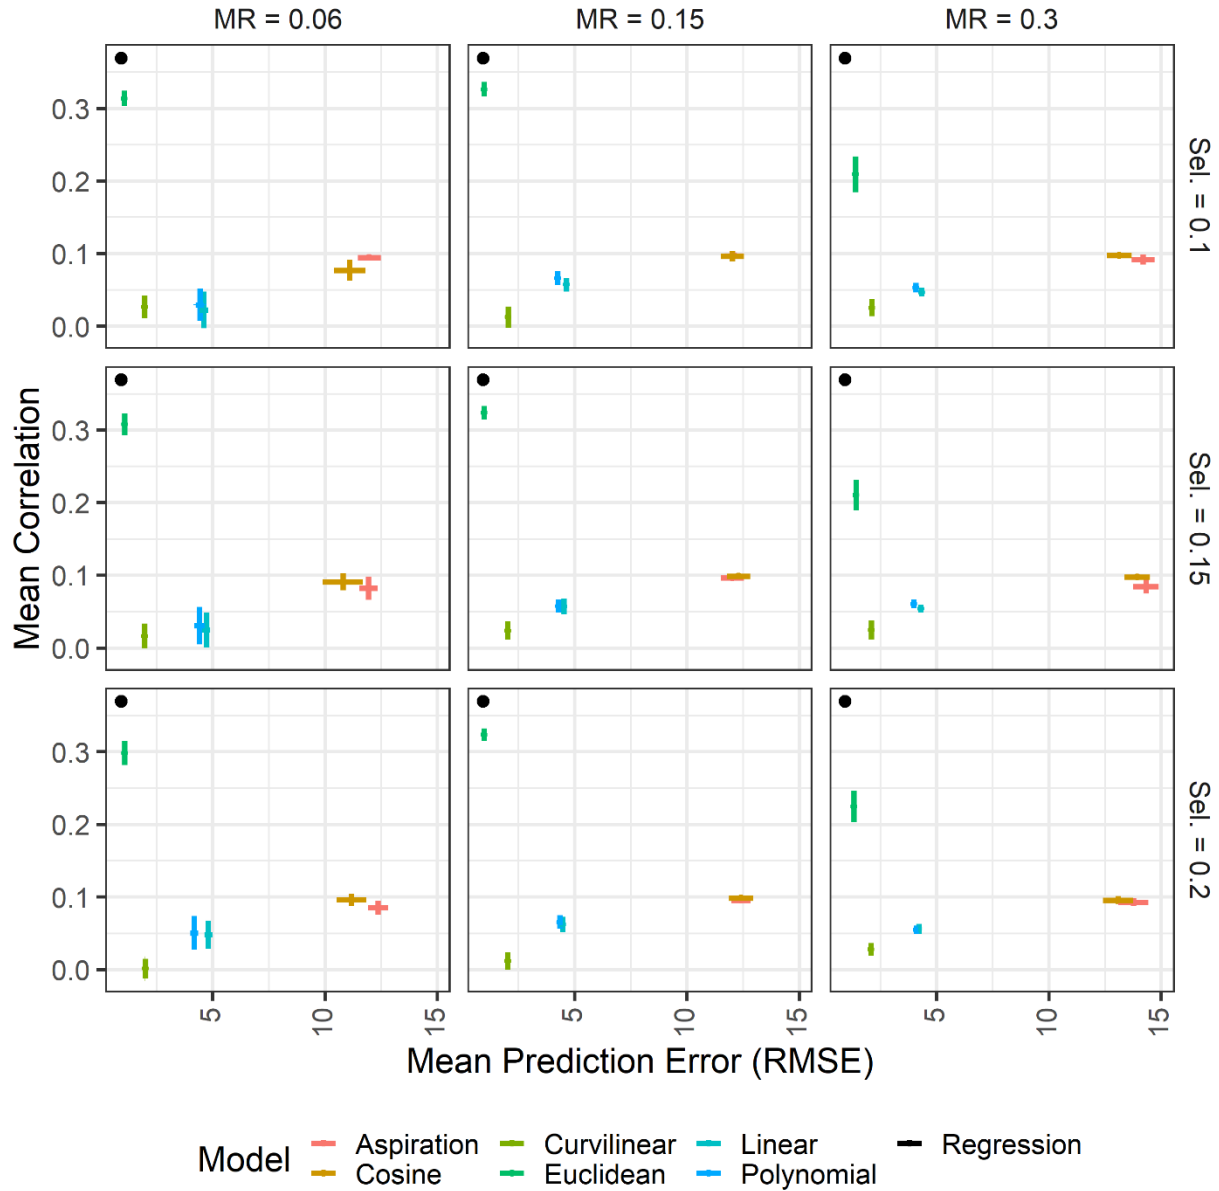

231

232 **Supplementary Figure S2.** Comparing the fit indices of each agent-based model to the cross-  
 233 cultural human data for models in which mate choice was based on minimum attraction. Error  
 234 bars represent 95% confidence intervals in both directions. “MR” = mutation rate; “Sel.” =  
 235 selection strength.

236

237

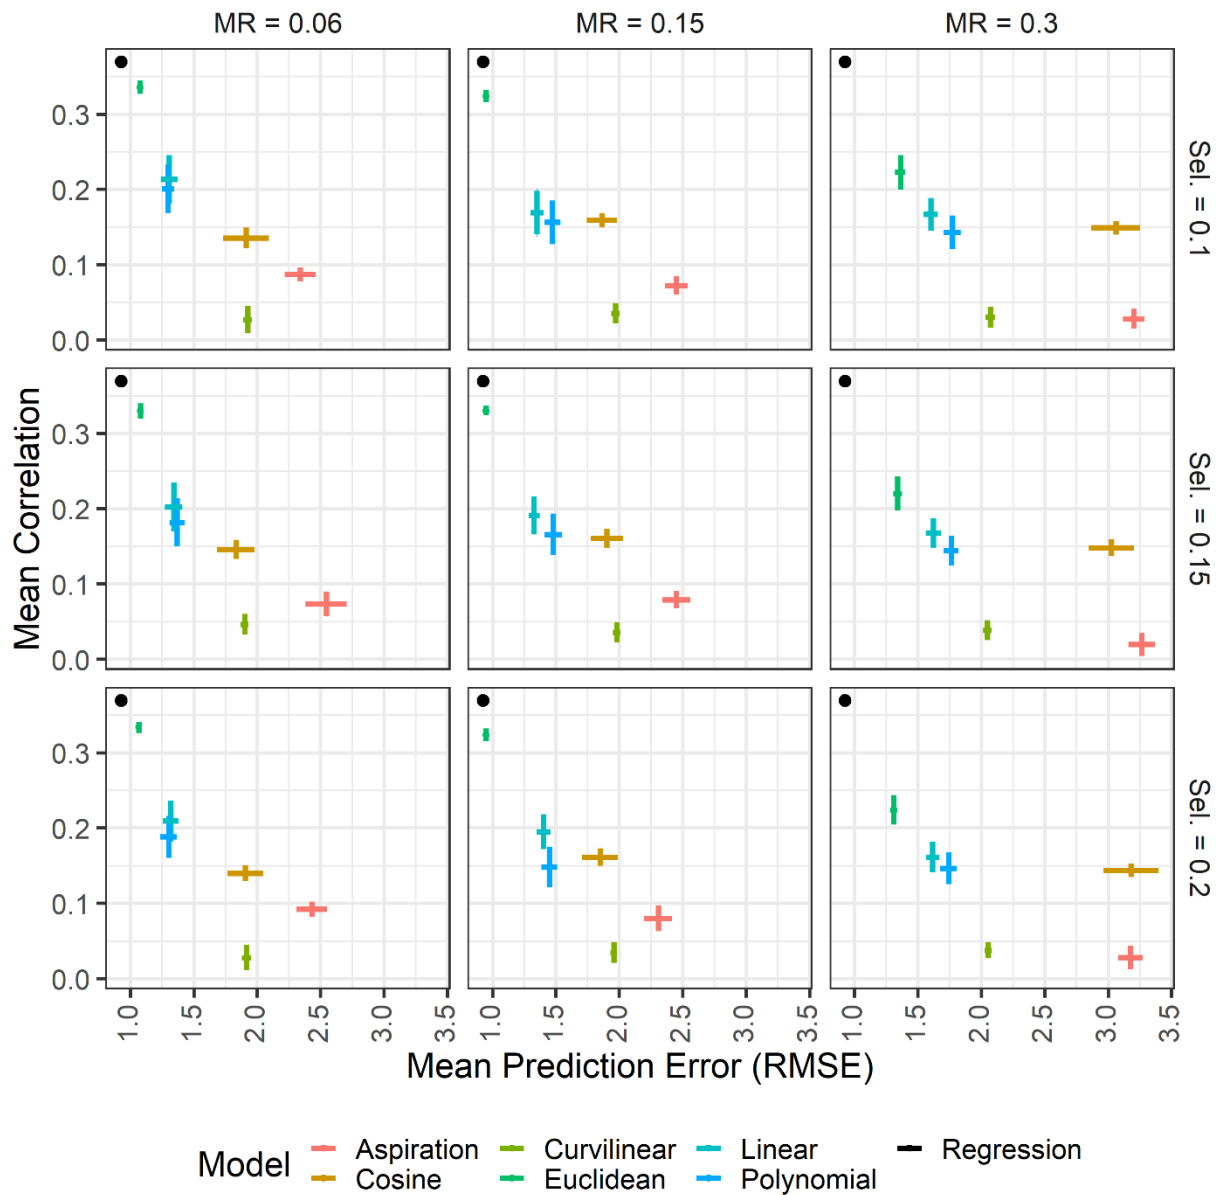

238

239 **Supplementary Figure S3.** Comparing the fit indices of each agent-based model to the cross-  
 240 cultural human data for models in which agents conduct an incomplete search of the mating  
 241 market. Error bars represent 95% confidence intervals in both directions. “MR” = mutation rate;  
 242 “Sel.” = selection strength.

243

244

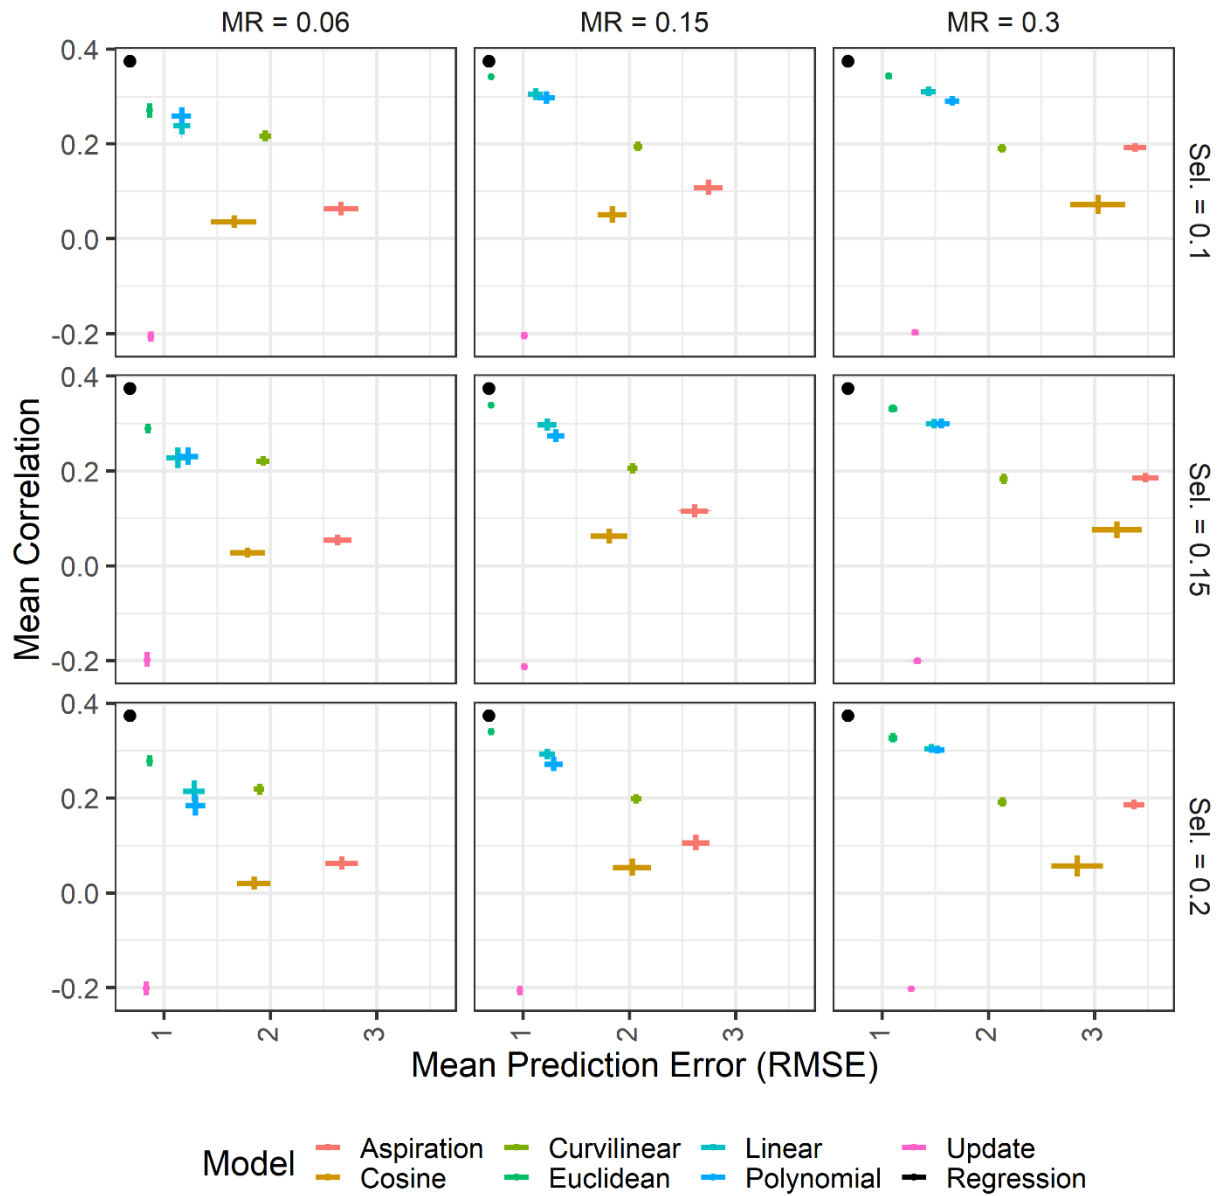

245

246 **Supplementary Figure S4.** Comparing the fit indices of each agent-based model to inferred  
 247 dyads from the cross-cultural human data using the strict dyad inference procedure. Error bars  
 248 represent 95% confidence intervals in both directions. “MR” = mutation rate; “Sel.” = selection  
 249 strength.

250

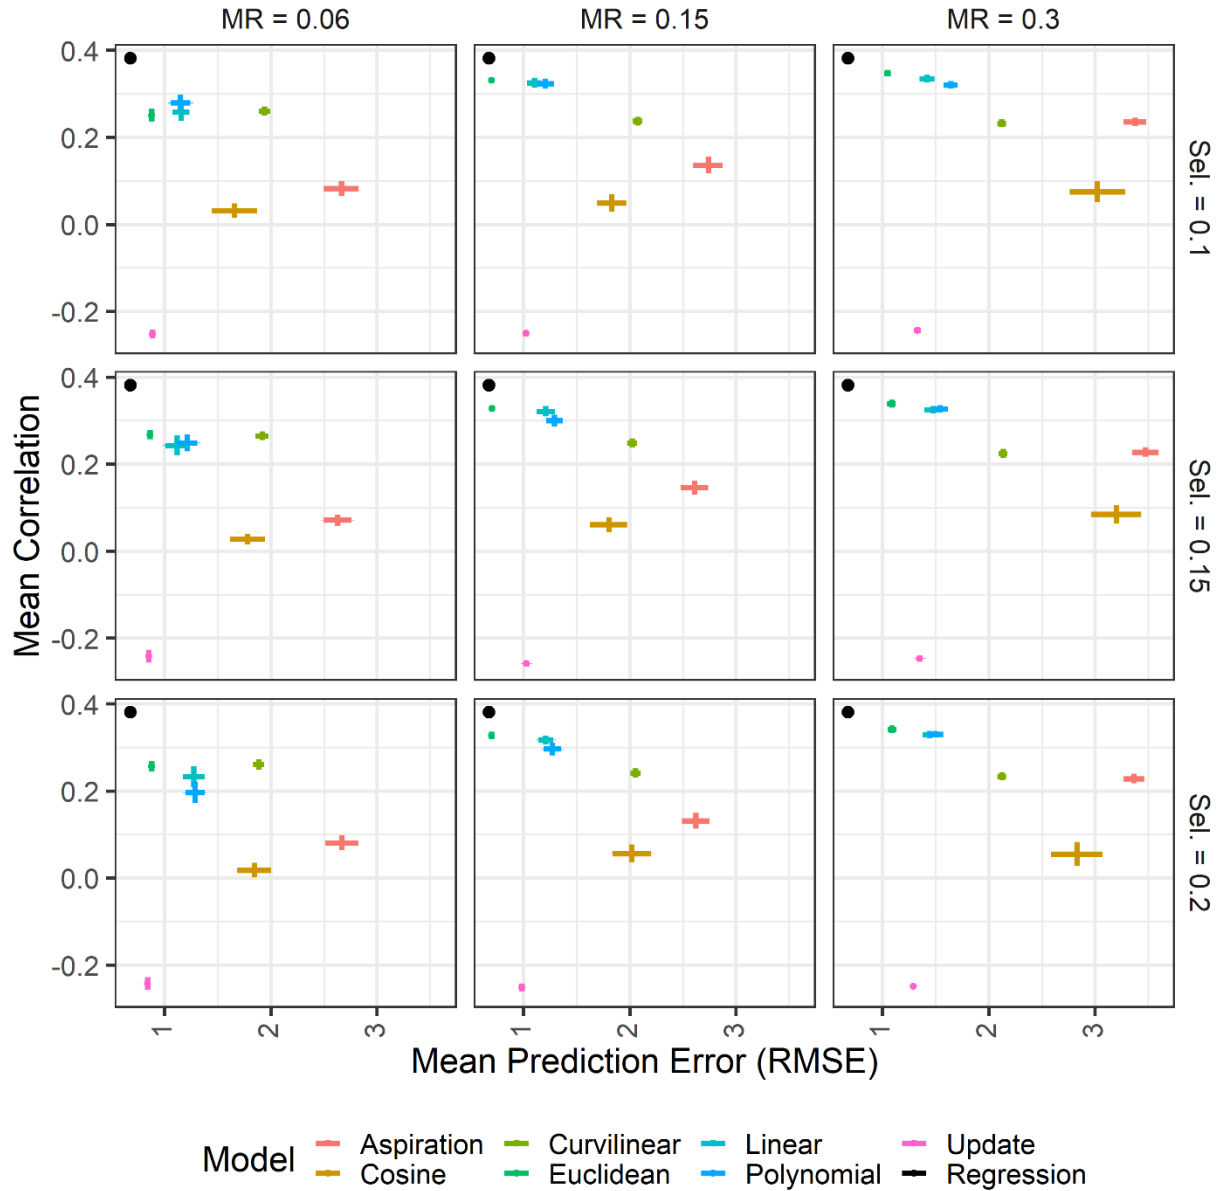

251

252 **Supplementary Figure S5.** Comparing the fit indices of each agent-based model to inferred  
 253 dyads from the cross-cultural human data using the less-strict dyad inference procedure. Error  
 254 bars represent 95% confidence intervals in both directions. “MR” = mutation rate; “Sel.” =  
 255 selection strength.

256

257

258 **Supplementary Table S1**259 *Model fit statistics from out-of-sample prediction accuracy procedure across models and across*260 *parameter settings.*

| Model       | Mutation Rate | Selection Strength | RMSE Mean | RMSE 95% CI | <i>r</i> Mean | <i>r</i> 95% CI |
|-------------|---------------|--------------------|-----------|-------------|---------------|-----------------|
| Euclidean   | 0.06          | 0.1                | 1.06      | 1.04 - 1.08 | 0.34          | 0.33 - 0.35     |
| Euclidean   | 0.06          | 0.15               | 1.05      | 1.04 - 1.07 | 0.33          | 0.32 - 0.34     |
| Euclidean   | 0.06          | 0.2                | 1.06      | 1.05 - 1.08 | 0.34          | 0.33 - 0.34     |
| Euclidean   | 0.15          | 0.1                | 0.95      | 0.94 - 0.95 | 0.34          | 0.33 - 0.34     |
| Euclidean   | 0.15          | 0.15               | 0.95      | 0.95 - 0.96 | 0.34          | 0.33 - 0.34     |
| Euclidean   | 0.15          | 0.2                | 0.95      | 0.95 - 0.95 | 0.33          | 0.33 - 0.34     |
| Euclidean   | 0.3           | 0.1                | 1.29      | 1.26 - 1.31 | 0.27          | 0.26 - 0.29     |
| Euclidean   | 0.3           | 0.15               | 1.30      | 1.27 - 1.33 | 0.25          | 0.24 - 0.27     |
| Euclidean   | 0.3           | 0.2                | 1.29      | 1.26 - 1.32 | 0.23          | 0.21 - 0.25     |
| Aspiration  | 0.06          | 0.1                | 2.41      | 2.27 - 2.55 | 0.08          | 0.07 - 0.1      |
| Aspiration  | 0.06          | 0.15               | 2.38      | 2.27 - 2.49 | 0.08          | 0.07 - 0.1      |
| Aspiration  | 0.06          | 0.2                | 2.42      | 2.29 - 2.55 | 0.08          | 0.07 - 0.1      |
| Aspiration  | 0.15          | 0.1                | 2.52      | 2.4 - 2.64  | 0.07          | 0.06 - 0.08     |
| Aspiration  | 0.15          | 0.15               | 2.41      | 2.3 - 2.51  | 0.06          | 0.05 - 0.08     |
| Aspiration  | 0.15          | 0.2                | 2.42      | 2.31 - 2.52 | 0.09          | 0.07 - 0.1      |
| Aspiration  | 0.3           | 0.1                | 3.21      | 3.12 - 3.3  | 0.02          | 0 - 0.03        |
| Aspiration  | 0.3           | 0.15               | 3.30      | 3.18 - 3.41 | 0.02          | 0 - 0.03        |
| Aspiration  | 0.3           | 0.2                | 3.19      | 3.1 - 3.27  | 0.03          | 0.02 - 0.04     |
| Cosine      | 0.06          | 0.1                | 1.68      | 1.49 - 1.86 | 0.17          | 0.15 - 0.18     |
| Cosine      | 0.06          | 0.15               | 1.76      | 1.63 - 1.9  | 0.15          | 0.13 - 0.16     |
| Cosine      | 0.06          | 0.2                | 1.80      | 1.68 - 1.93 | 0.15          | 0.14 - 0.16     |
| Cosine      | 0.15          | 0.1                | 1.77      | 1.67 - 1.88 | 0.17          | 0.16 - 0.19     |
| Cosine      | 0.15          | 0.15               | 1.75      | 1.61 - 1.89 | 0.19          | 0.17 - 0.2      |
| Cosine      | 0.15          | 0.2                | 1.92      | 1.77 - 2.07 | 0.16          | 0.15 - 0.17     |
| Cosine      | 0.3           | 0.1                | 2.84      | 2.62 - 3.06 | 0.17          | 0.16 - 0.18     |
| Cosine      | 0.3           | 0.15               | 2.98      | 2.78 - 3.18 | 0.15          | 0.14 - 0.16     |
| Cosine      | 0.3           | 0.2                | 2.68      | 2.47 - 2.89 | 0.18          | 0.16 - 0.19     |
| Curvilinear | 0.06          | 0.1                | 1.91      | 1.87 - 1.94 | 0.03          | 0.02 - 0.05     |
| Curvilinear | 0.06          | 0.15               | 1.89      | 1.85 - 1.93 | 0.03          | 0.02 - 0.05     |
| Curvilinear | 0.06          | 0.2                | 1.86      | 1.83 - 1.9  | 0.04          | 0.02 - 0.05     |
| Curvilinear | 0.15          | 0.1                | 1.99      | 1.97 - 2.02 | 0.03          | 0.02 - 0.04     |
| Curvilinear | 0.15          | 0.15               | 1.96      | 1.93 - 1.99 | 0.04          | 0.02 - 0.05     |
| Curvilinear | 0.15          | 0.2                | 1.98      | 1.95 - 2.01 | 0.03          | 0.01 - 0.04     |
| Curvilinear | 0.3           | 0.1                | 2.03      | 2 - 2.06    | 0.05          | 0.04 - 0.06     |
| Curvilinear | 0.3           | 0.15               | 2.04      | 2.01 - 2.06 | 0.04          | 0.03 - 0.05     |

|             |      |      |      |             |       |               |
|-------------|------|------|------|-------------|-------|---------------|
| Curvilinear | 0.3  | 0.2  | 2.03 | 2.01 - 2.06 | 0.04  | 0.03 - 0.05   |
| Linear      | 0.06 | 0.1  | 1.29 | 1.24 - 1.34 | 0.21  | 0.19 - 0.24   |
| Linear      | 0.06 | 0.15 | 1.26 | 1.19 - 1.33 | 0.24  | 0.21 - 0.26   |
| Linear      | 0.06 | 0.2  | 1.36 | 1.29 - 1.43 | 0.20  | 0.17 - 0.23   |
| Linear      | 0.15 | 0.1  | 1.31 | 1.26 - 1.37 | 0.22  | 0.19 - 0.24   |
| Linear      | 0.15 | 0.15 | 1.38 | 1.31 - 1.44 | 0.21  | 0.19 - 0.24   |
| Linear      | 0.15 | 0.2  | 1.39 | 1.33 - 1.44 | 0.19  | 0.17 - 0.22   |
| Linear      | 0.3  | 0.1  | 1.59 | 1.54 - 1.64 | 0.19  | 0.17 - 0.21   |
| Linear      | 0.3  | 0.15 | 1.64 | 1.57 - 1.7  | 0.17  | 0.15 - 0.19   |
| Linear      | 0.3  | 0.2  | 1.61 | 1.55 - 1.66 | 0.18  | 0.16 - 0.2    |
| Polynomial  | 0.06 | 0.1  | 1.30 | 1.24 - 1.37 | 0.22  | 0.19 - 0.24   |
| Polynomial  | 0.06 | 0.15 | 1.32 | 1.25 - 1.39 | 0.21  | 0.18 - 0.24   |
| Polynomial  | 0.06 | 0.2  | 1.35 | 1.28 - 1.41 | 0.22  | 0.2 - 0.24    |
| Polynomial  | 0.15 | 0.1  | 1.37 | 1.31 - 1.44 | 0.20  | 0.18 - 0.23   |
| Polynomial  | 0.15 | 0.15 | 1.43 | 1.37 - 1.5  | 0.19  | 0.16 - 0.22   |
| Polynomial  | 0.15 | 0.2  | 1.40 | 1.33 - 1.46 | 0.20  | 0.18 - 0.23   |
| Polynomial  | 0.3  | 0.1  | 1.78 | 1.72 - 1.84 | 0.15  | 0.12 - 0.17   |
| Polynomial  | 0.3  | 0.15 | 1.70 | 1.63 - 1.76 | 0.16  | 0.14 - 0.18   |
| Polynomial  | 0.3  | 0.2  | 1.65 | 1.59 - 1.71 | 0.18  | 0.16 - 0.2    |
| Random      | 0.06 | 0.1  | 8.07 | 7.67 - 8.47 | 0.08  | 0.07 - 0.09   |
| Random      | 0.06 | 0.15 | 8.04 | 7.54 - 8.53 | 0.09  | 0.08 - 0.1    |
| Random      | 0.06 | 0.2  | 8.62 | 8.04 - 9.2  | 0.09  | 0.07 - 0.1    |
| Random      | 0.15 | 0.1  | 8.50 | 8.07 - 8.92 | 0.09  | 0.08 - 0.09   |
| Random      | 0.15 | 0.15 | 8.33 | 8.01 - 8.65 | 0.08  | 0.07 - 0.09   |
| Random      | 0.15 | 0.2  | 8.30 | 7.85 - 8.75 | 0.08  | 0.06 - 0.09   |
| Random      | 0.3  | 0.1  | 9.07 | 8.65 - 9.49 | 0.09  | 0.08 - 0.09   |
| Random      | 0.3  | 0.15 |      | 9.51 -      |       |               |
|             |      |      | 9.93 | 10.34       | 0.07  | 0.06 - 0.08   |
| Random      | 0.3  | 0.2  | 9.38 | 8.97 - 9.79 | 0.08  | 0.07 - 0.09   |
| Update      | 0.06 | 0.1  | 1.05 | 1.04 - 1.06 | 0.02  | 0 - 0.04      |
| Update      | 0.06 | 0.15 | 1.05 | 1.04 - 1.06 | 0.03  | 0.01 - 0.06   |
| Update      | 0.06 | 0.2  | 1.06 | 1.05 - 1.07 | 0.02  | -0.01 - 0.05  |
| Update      | 0.15 | 0.1  | 1.11 | 1.09 - 1.13 | 0.00  | -0.02 - 0.01  |
| Update      | 0.15 | 0.15 | 1.11 | 1.09 - 1.13 | -0.01 | -0.03 - 0     |
| Update      | 0.15 | 0.2  | 1.09 | 1.08 - 1.1  | -0.01 | -0.02 - 0.01  |
| Update      | 0.3  | 0.1  | 1.33 | 1.31 - 1.36 | -0.01 | -0.02 - 0     |
| Update      | 0.3  | 0.15 | 1.35 | 1.32 - 1.37 | -0.02 | -0.03 - -0.01 |
| Update      | 0.3  | 0.2  | 1.30 | 1.28 - 1.32 | -0.02 | -0.03 - -0.01 |

261

262
